# Supplementary material
Source: ML conference proceedings conference paper supplement (https://proceedings.neurips.cc/paper_files/paper/2023/hash/9278abf072b58caf21d48dd670b4c721-Abstract.html)
Supplement: Supplementary file 1 [file 9278abf072b58caf21d48dd670b4c721-Supplemental-Conference.pdf]

---

# Supplementary Material for CrossGNN: Confronting Noisy Multivariate Time Series Via Cross Interaction Refinement

---

Anonymous Author(s)

Affiliation

Address

email

## 1 Appendix

2 The supplementary material consists of:

3 **A. Experimental Details:** Descriptions of datasets, baseline methods, and implementation details.

4 **B. Additional Experimental Results:** Robustness analysis on noisy data, sensitivity analysis on  
5 hyperparameters, and visualization of forecasting results.

6 **C. Derivation of Computational Complexity:** A theoretical proof of the linear computation  
7 complexity of CrossGNN.

## 8 A Experimental Details

### 9 A.1 Datasets

10 We conduct extensive experiments on 8 real-world datasets following [4]. The interval length, time  
11 step number, and the variable number of each real-world dataset are presented in Table 1. The  
12 detailed dataset descriptions are as follows:

13 **1) ETTh (ETTh1, ETTh2, ETTm1, ETTm2)** consists of two hourly-level datasets (ETTh) and two  
14 15minute-level datasets (ETTm). Each of them contains seven oil and load features of electricity  
15 transformers from July 2016 to July 2018.

16 **2) Weather** includes 21 indicators of weather, such as air temperature, and humidity. Its data is  
17 recorded every 10 min for 2020 in Germany.

18 **3) Traffic** describes hourly road occupancy rates measured by 862 sensors on San Francisco Bay  
19 area freeways from 2015 to 2016.

20 **4) Exchange-rate** collects the daily exchange rates of 8 countries from 1990 to 2016.

21 **5) Electricity** contains hourly electricity consumption (in Kwh) of 321 clients from 2012 to 2014.

Table 1: The statistics of the datasets for MTS forecasting.

| Datasets        | ETTh1  | ETTh2  | ETTm1      | ETTm2      | Weather    | Traffic | Exchange-rate | Electricity |
|-----------------|--------|--------|------------|------------|------------|---------|---------------|-------------|
| Interval Length | 1 Hour | 1 Hour | 15 Minutes | 15 Minutes | 10 Minutes | 1 Hour  | 1 Day         | 1 Hour      |
| Time step #     | 17,420 | 17,420 | 69,680     | 69,680     | 52,696     | 17,544  | 7,588         | 26,304      |
| Variable #      | 7      | 7      | 7          | 7          | 21         | 862     | 8             | 321         |

### 22 A.2 Baseline Methods

23 We briefly describe the selected 7 state-of-the-art baselines as follows:

24 **1) TimesNet [3]** is a task-general foundational model for time series analysis that utilizes a modular  
25 architecture to unravel intricate temporal variations. A parameter-efficient inception block is leveraged

26 to capture intra-period and inter-period variations in 2D space.  
 27 **2) ETSformer** [2] is a Transformer-based model for time-series forecasting that incorporates  
 28 inductive biases of time-series structures and introduces novel exponential smoothing attention (ESA)  
 29 and frequency attention (FA) to improve performance.  
 30 **3) DLinear** [6] is a simple linear-based model combined with a decomposition scheme.  
 31 **4) FEDformer** [7] is a Transformer-based model that uses the seasonal-trend decomposition with  
 32 frequency-enhanced blocks to capture cross-time dependency for forecasting.  
 33 **5) Autoformer** [4] is a Transformer-based model using decomposition architecture with an auto-  
 34 Correlation mechanism to capture cross-time dependency for forecasting.  
 35 **6) Pyraformer** [1] is a Transformer-based model learning multi-resolution representation of the time  
 36 series by the pyramidal attention module to capture cross-time dependency for forecasting.  
 37 **7) MTGNN** [5] explicitly utilizes cross-variable dependency using GNN. A graph learning layer  
 38 learns a graph structure where each node represents one variable in MTS.

### 39 A.3 Implementation Details

40 To ensure a fair comparison, the look-back window size is set to 96, which is consistent with all  
 41 baselines. We set the scale numbers  $S$  to 5 and set  $K$  to 15 for all datasets, as sensitivity experiments  
 42 have shown that  $S$  does not have a significant impact beyond 5 and CrossGNN is not sensitive to  $K$ .  
 43 Besides, the dimension of the channel is set to 16 based on efficiency considerations. Additionally,  
 44 the mean squared error (MSE) is used as the loss function. For the learning rate, a grid search is  
 45 conducted among [5e-3, 1e-3, 5e-4, 1e-4, 5e-5, 1e-5] to obtain the most suitable learning rate for all  
 46 datasets. The total number of training epochs is set to 10, and training would be terminated early  
 47 if the validation loss does not decrease for three consecutive rounds. The model is implemented in  
 48 PyTorch 1.8.0 and trained on a single NVIDIA Tesla V100 PCIe GPU with 16GB memory.

## 49 B Additional Experimental Results

### 50 B.1 Analysis on Robustness Against Noise

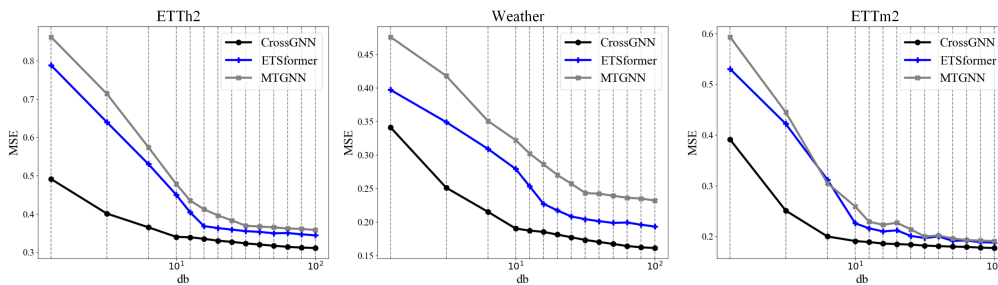

Figure 1: The MSE results (Y-axis) of models on ETTh2, ETTm2 and Weather with different signal-to-noise ratio (SNR).

51 To evaluate the robustness of CrossGNN against noise, we add different intensities of Gaussian white  
 52 noise to the original MTS and observe the performance changes. As the intensity of Gaussian white  
 53 noise increases, the signal-to-noise ratio (SNR) gradually decreases from 100 dB to 0 dB. Figure 1  
 54 shows the MSE results of CrossGNN, ETSformer [2] and MTGNN [5] on ETTh2, ETTTm2, and  
 55 Weather under different SNR. As the SNR decreases from 100db to 0db, the mean square error (MSE)  
 56 of CrossGNN increases more slowly than MTGNN and ETSformer.

57 Taking the results on the ETTm2 dataset as an example, when the noise intensity increases at the  
 58 beginning (i.e., SNR decreases from 100db to 10db), the prediction accuracy of MTGNN and  
 59 ETSformer becomes unstable. Their prediction accuracy drops more rapidly when the noise intensity  
 60 suddenly increases (i.e., SNR decreases from 10db to 0db). In contrast, CrossGNN maintains  
 61 overall stability, and its performance degrades more slowly. The quantitative results demonstrate  
 62 that CrossGNN exhibits good robustness against noisy data and has a great advantage when dealing  
 63 with unexpected fluctuations. Such improvements benefit from the explicit modeling of respective  
 64 cross-scale and cross-variable interactions.

65 **B.2 Sensitivity Analysis**

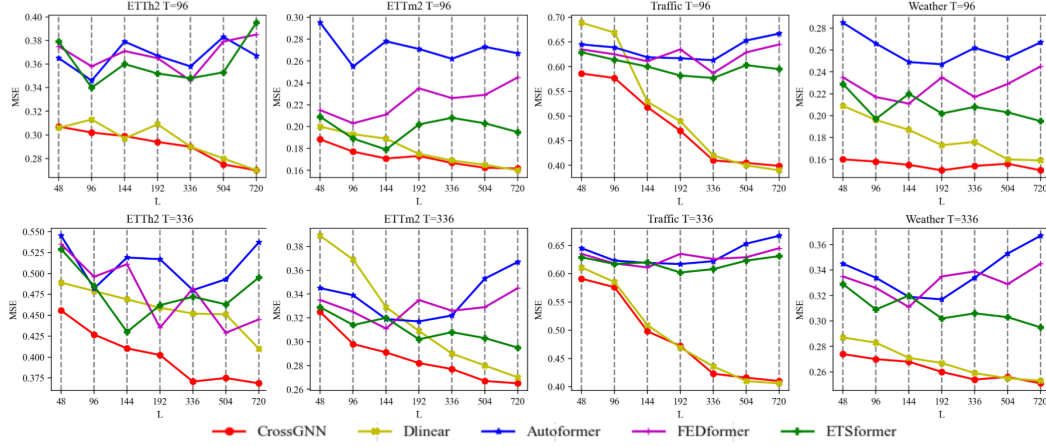

Figure 2: The MSE results (Y-axis) of models with different look-back window sizes (X-axis) on ETTh2, ETTm2, Traffic and Weather. The first row shows the performance when the prediction horizon is 96, while the second row shows the performance when the prediction horizon is 336.

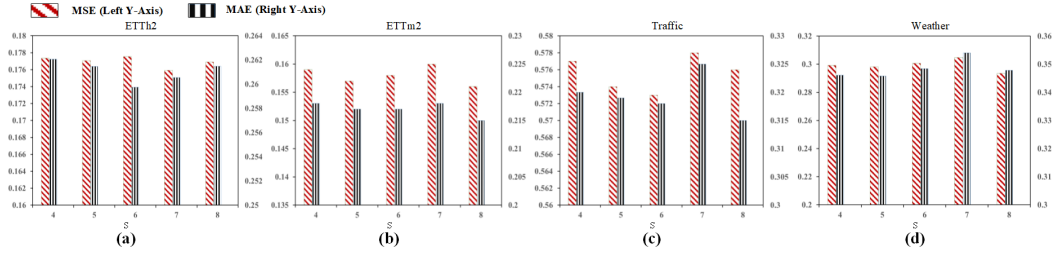

Figure 3: The MSE (left Y-axis) and MAE results (right Y-axis) of CrossGNN with different number of scales (X-axis) on ETTh2, ETTm2, Traffic, and Weather.

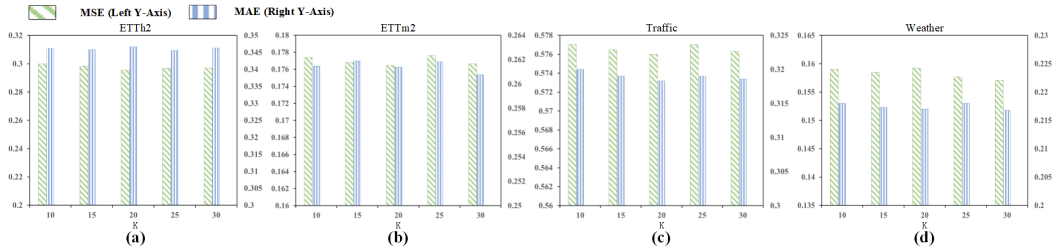

Figure 4: The MSE (left Y-axis) and MAE results (right Y-axis) of CrossGNN with different K (X-axis) on ETTh2, ETTm2, Traffic, and Weather.

66 **Look-Back Window Size** Figure 2 shows the MSE results of models with different look-back  
 67 window sizes on four datasets. As the window size increases, the performance of Transformer-based  
 68 models fluctuates while CrossGNN constantly improves. This indicates that the attention mechanism  
 69 of Transformer-based models may focus much more on the temporal noise, while CrossGNN can  
 70 better extract the relationships between different time nodes via the Cross-Scale module.

71 **Number of Scales** We vary the number of scales from 4 to 8 and report the MSE and MAE results  
 72 on ETTh2, ETTm2, Traffic, and Weather. As shown in Figure 3, We observe that the performance  
 73 improvement becomes less significant after a certain number of scales (i.e., 5), indicating that a  
 74 certain scale size is sufficient to eliminate most of the effects of temporal noise.

75 **Number of Temporal Node Neighbors** The number of temporal neighboring nodes is primarily  
 76 determined by the hyperparameter  $K$ . As depicted in Figure 4, we conducted experiments with  
 77 different  $K$  values, including 10, 15, 20, 25, and 30, and observed that CrossGNN is not sensitive to  
 78 the number of  $K$ . This suggests that effective cross-scale interaction can be achieved by focusing  
 79 only on strongly correlated time nodes.

### 80 B.3 Visualization of Forecasting Results of Different Models

81 We present the visualization of forecasting results of CrossGNN and other baseline models on 8  
 82 datasets in Figure 5 and Figure 6. These datasets exhibit diverse temporal patterns, with 96-steps  
 83 input length and output horizon. It can be observed that the prediction results of the Transformer-  
 84 based model are significantly affected by noise, resulting in fluctuations. In contrast, the prediction  
 85 results of CrossGNN are less affected by noise, and the predicted values are closer to the true results.

86 For example, considering the forecasting results on the Traffic dataset, there are three unexpected  
 87 noise points (i.e., irregularly high points) in the input data. During prediction, the attention mechanism  
 88 of the Transformer-based model may focus on the noisy points, leading to a bias towards higher  
 89 output predictions. As a result, although the Transformer-based model seems to capture the periods  
 90 of the time series, it fails to produce accurate predictions. In contrast, CrossGNN is unaffected by  
 91 these three noisy data points and generates predictions that are closer to the ground truth. While  
 92 Transformer-based models struggle to capture the scale and bias of future data due to unexpected  
 93 noise in the input data, CrossGNN outperforms other models in terms of both scale and bias in  
 forecasting.

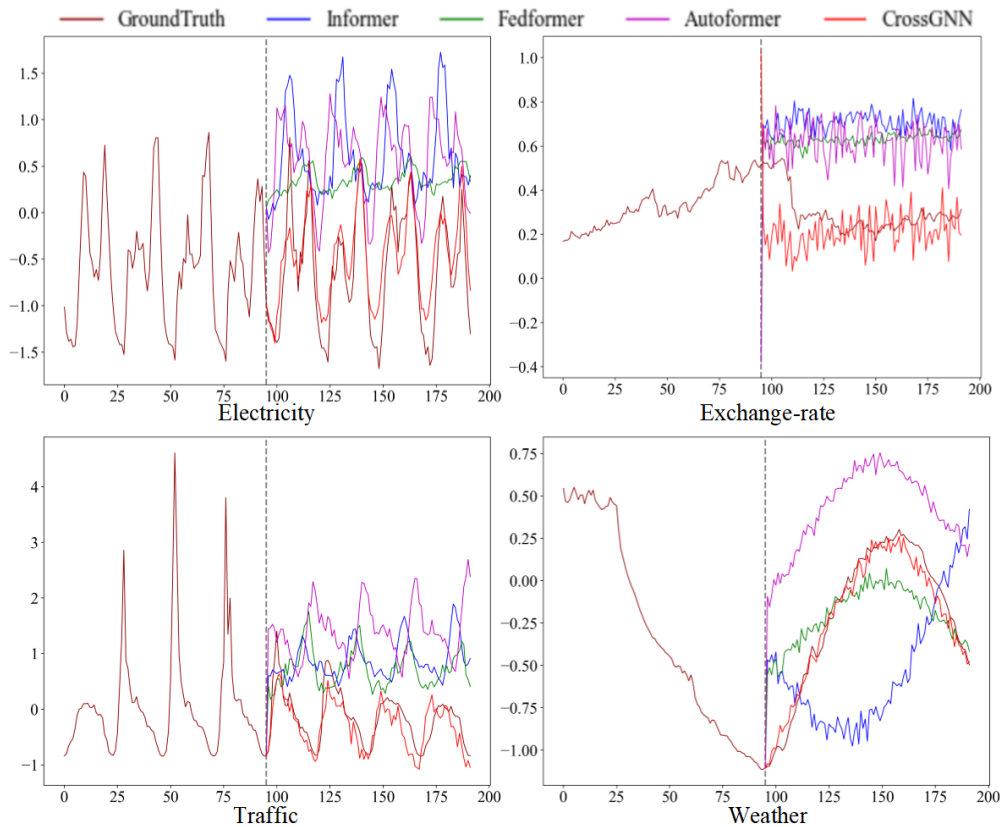

Figure 5: Visualization of 96-step forecasting results on Electricity, Exchange-rate, Traffic, and Weather, and the look-back window size is set as 96.

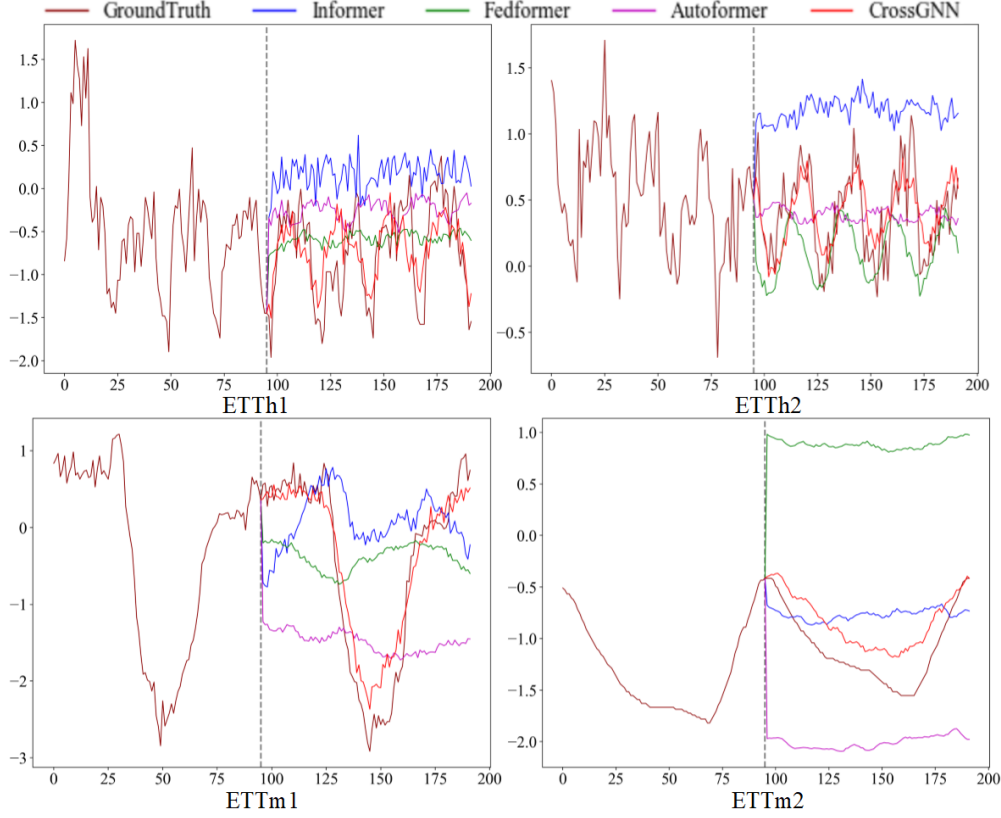

Figure 6: Visualization of 96-step forecasting results on ETTh1, ETTh2, ETTm1 and ETTm2, and the look-back window size is set as 96.

## 95 C Derivation of Computational Complexity

96 In this section, we theoretically prove that the time and space complexity of the Cross-Scale module  
 97 and Cross-Variable module in CrossGNN are both linear. We have organized the notations used in  
 98 Table 2 for ease of reading.

Table 2: Meaning of notations

| Notation    | Meaning                                                 |
|-------------|---------------------------------------------------------|
| $v_i$       | The $i$ -th time node                                   |
| $S$         | Number of scales                                        |
| $s$         | Index of the scale                                      |
| $p_s$       | Period length of the $s$ -th scale                      |
| $L$         | Original input length (i.e., look-back window size)     |
| $L(s)$      | Time length at the $s$ -th scale                        |
| $L'$        | Total length of concatenated multi-scale time series    |
| $K^{scale}$ | The hyperparameter to control temporal neighbor numbers |
| $K^{var}$   | The hyperparameter to control variable neighbor numbers |
| $k_s$       | The temporal neighbor numbers at the $s$ -th scale      |
| $A(v_i)$    | Total temporal neighbor node number correlated to $v_i$ |
| $A$         | Total correlated temporal node pair number              |
| $D$         | Variable numbers                                        |

99 **Proposition 1.** The time and space complexity for the Cross-scale GNN is  $O(K^{scale} \times \ln S \times L)$   
 100 and amounts to  $O(L)$  when  $S$  and  $K^{scale}$  are constants w.r.t.  $L$ .

101 *Proof.* To improve readability, we substitute  $K$  for  $K^{scale}$ . Denote  $L(s)$  as the number of time nodes  
 102 at  $s$ -th scale:

$$L(s) = \lfloor \frac{L}{p_s} \rfloor, 1 \leq s \leq S, \quad (1)$$

103 where  $p_s$  is the corresponding period length of the  $s$ -th scale and  $L$  is the original input length (i.e.,  
 104 look-back window size).  $L'$  is the sum of time nodes at different scales, and it could be expressed by:

$$L' = \sum_{s=1}^S L(s) = \sum_{s=1}^S \lfloor \frac{L}{p_s} \rfloor \leq \sum_{s=1}^S \lfloor \frac{L}{s} \rfloor \leq L \sum_{s=1}^S \frac{1}{s} \approx L(\ln S + \epsilon + \frac{1}{2S}), \quad (2)$$

105 where  $\ln S + \epsilon + \frac{1}{2S} \approx \sum_{s=1}^S \frac{1}{s}$  is the approximate summation formula for the harmonic series, and  
 106  $\epsilon$  is the Euler-Mascheroni constant.

107 For a time node, we set its scale-sensitive time node neighbor numbers to  $k_s = \lceil \frac{K}{p_s} \rceil$  at  $s$ -th scale.  
 108 Since the trend-aware neighbor nodes are defined as its previous node and next node at the current  
 109 scale, the number of trend-aware neighbor nodes can reach 2 when these nodes do not overlap with  
 110 the scale-sensitive neighbor nodes. However, when there is overlap, the number of trend-aware  
 111 neighbor nodes can be 0 or 1. Therefore, the maximum neighbor node number of  $v_i$  is given by:

$$A(v_i) \leq \sum_{s=1}^S k_s + 2 \quad (3)$$

$$= K \sum_{s=1}^{s=S} \frac{1}{p(s)} + 2 \quad (4)$$

$$\leq K(\frac{1}{1} + \frac{1}{2} + \dots + \frac{1}{S}) + 2 \quad (5)$$

$$\approx K(\ln S + \epsilon + \frac{1}{2S}) + 2, \quad (6)$$

112 Total correlated node pair number is expressed as:

$$A = L' \times A(v_i) \leq L(\ln S + \epsilon + \frac{1}{2S})(K(\ln S + \epsilon + \frac{1}{2S}) + 2) \approx 2K \times \ln(S) \times L. \quad (7)$$

113 Consequently, the complexity of the proposed cross-scale GNN is:

$$O(A) \leq O(2K \times \ln(S) \times L). \quad (8)$$

114 Since  $K$  and  $S$  are all constant terms that are independent of the length  $L$  and remain fixed when  $L$   
 115 changes, the complexity can be further reduced to  $O(L)$ .  $\square$

116 **Proposition 2.** *The time and space complexity for the Cross-variable GNN is  $O(K^{var} \times D)$  and  
 117 amounts to  $O(D)$  when  $K^{var}$  is a constant w.r.t.  $D$ .*

118 *Proof.* Without loss of generality, we assume that the number of homogeneous and heterogeneous  
 119 correlated nodes for each variable are both  $K^{var}$ . For a cross-variable graph, there are a total of  
 120  $\sum_{i=1}^D 2K^{var} = 2K^{var}D$  correlated variable node pairs. Correspondingly, since the complexity of  
 121 graph computation is related to the number of edges, the time and space complexity of cross-variable  
 122 GNN are both  $O(K^{var} \times D)$ . As  $K^{var}$  is a constant that is independent of  $D$ , its complexity is linear  
 123 (i.e.,  $O(D)$ ).  $\square$

## 124 References

- 125 [1] Shizhan Liu, Hang Yu, Cong Liao, Jianguo Li, Weiyao Lin, Alex X Liu, and Schahram Dustdar.  
 126 Pyraformer: Low-complexity pyramidal attention for long-range time series modeling and  
 127 forecasting. In *International conference on learning representations*.
- 128 [2] Gerald Woo, Chenghao Liu, Doyen Sahoo, Akshat Kumar, and Steven C. H. Hoi. Etsformer:  
 129 Exponential smoothing transformers for time-series forecasting. 2022.

- 130 [3] Haixu Wu, Tengge Hu, Yong Liu, Hang Zhou, Jianmin Wang, and Mingsheng Long. Timesnet:  
131 Temporal 2d-variation modeling for general time series analysis. In *International Conference on*  
132 *Learning Representations*, 2023.
- 133 [4] Haixu Wu, Jiehui Xu, Jianmin Wang, and Mingsheng Long. Autoformer: Decomposition trans-  
134 formers with auto-correlation for long-term series forecasting. *Advances in Neural Information*  
135 *Processing Systems*, 34:22419–22430, 2021.
- 136 [5] Zonghan Wu, Shirui Pan, Guodong Long, Jing Jiang, Xiaojun Chang, and Chengqi Zhang.  
137 Connecting the dots: Multivariate time series forecasting with graph neural networks. In  
138 *Proceedings of the 26th ACM SIGKDD International Conference on Knowledge Discovery &*  
139 *Data Mining*, 2020.
- 140 [6] Ailing Zeng, Muxi Chen, Lei Zhang, and Qiang Xu. Are transformers effective for time series  
141 forecasting? *arXiv preprint arXiv:2205.13504*, 2022.
- 142 [7] Tian Zhou, Ziqing Ma, Qingsong Wen, Xue Wang, Liang Sun, and Rong Jin. FEDformer:  
143 Frequency enhanced decomposed transformer for long-term series forecasting. In *Proc. 39th*  
144 *International Conference on Machine Learning (ICML 2022)*, 2022.
